# Supplementary material for: Association of Taxane Type With Patient-Reported Chemotherapy-Induced Peripheral Neuropathy Among Patients With Breast Cancer
Source: PubMed Central journal article supplement (PMC9631104; doi:10.1001/jamanetworkopen.2022.39788), 2022-11-02
Supplement: jamanetwopen-e2239788-s001.pdf [file jamanetwopen-e2239788-s001.pdf]

## Supplemental Online Content

Mo H, Yan X, Zhao F, et al. Association of taxane type with patient-reported chemotherapy-induced peripheral neuropathy among patients with breast cancer. *JAMA Netw Open*. 2022;5(11):e2239788.  
doi:10.1001/jamanetworkopen.2022.39788

**eTable 1.** The EORTC QLQ-CIPN20 Scores Before and After Taxane Treatment

**eTable 2.** Pairwise Association Between Types of Taxanes and Patient-Reported CIPN Among Patients With Breast Cancer

**eTable 3.** Multivariate Analysis Using Semiparametric Proportional Hazards Models

**eFigure 1.** Propensity Score Distributions According to the Types of Taxanes Used

**eTable 4.** Overlap Propensity Score–Weighted Demographic and Clinical Characteristics of the Cohort

**eFigure 2.** Covariate Balance Assessment in Overlap Weighting Using Maximum Pairwise Absolute Standardized Difference (ASD)

**eTable 5.** Overlap Propensity Score–Weighted Multivariate Analysis

**eTable 6.** Pairwise Association Between Types of Taxanes and Patient-Reported CIPN in the Inverse Probability Weighting Analysis

This supplemental material has been provided by the authors to give readers additional information about their work.

**eTable 1.** The EORTC QLQ-CIPN20 Scores Before and After Taxane Treatment

| EORTC QLQ-CIPN20 | Nab-paclitaxel | paclitaxel | docetaxel  | Between-group p value <sup>a</sup> | Between-group p value <sup>b</sup> | Between-group p value <sup>c</sup> |
|------------------|----------------|------------|------------|------------------------------------|------------------------------------|------------------------------------|
| Total Score      |                |            |            |                                    |                                    |                                    |
| Baseline         | 20.18±2.59     | 19.97±3.12 | 20.01±2.47 | 1.00                               | 1.00                               | 1.00                               |
| After cycle 1    | 22.72±4.34     | 20.95±3.05 | 21.10±3.42 | 0.03                               | 0.13                               | 1.00                               |
| After cycle 2    | 23.52±4.47     | 21.38±3.50 | 21.77±4.25 | 0.006                              | 0.15                               | 1.00                               |
| After cycle 3    | 24.76±5.56     | 22.24±4.64 | 22.26±4.71 | 0.0003                             | 0.0263                             | 1.00                               |
| After cycle 4    | 26.53±8.33     | 21.93±3.81 | 22.05±3.31 | <.001                              | <.001                              | 1.00                               |
| > 4 cycles       | 25.38±5.56     | 21.85±4.05 | 22.18±4.02 | <.001                              | 0.0011                             | 1.00                               |
| Sensory scale    |                |            |            |                                    |                                    |                                    |
| Baseline         | 9.74±1.47      | 9.69±1.79  | 9.62±1.36  | 1.00                               | 1.00                               | 1.00                               |
| After cycle 1    | 11.29±2.56     | 10.01±1.66 | 10.16±1.96 | 0.0006                             | 0.0377                             | 1.00                               |
| After cycle 2    | 11.76±2.76     | 10.26±1.89 | 10.57±2.32 | <.001                              | 0.0119                             | 1.00                               |
| After cycle 3    | 12.73±3.41     | 10.65±2.55 | 10.68±2.53 | <.001                              | <.001                              | 1.00                               |
| After cycle 4    | 13.51±4.40     | 10.48±2.14 | 10.65±1.84 | <.001                              | <.001                              | 1.00                               |
| > 4 cycles       | 12.94±3.08     | 10.51±2.51 | 10.75±2.33 | <.001                              | <.001                              | 1.00                               |
| Motor scale      |                |            |            |                                    |                                    |                                    |
| Baseline         | 8.09±1.19      | 7.92±1.42  | 8.00±1.07  | 1.00                               | 1.00                               | 1.00                               |
| After cycle 1    | 8.81±1.81      | 8.39±1.37  | 8.38±1.48  | 0.96                               | 0.95                               | 1.00                               |
| After cycle 2    | 9.05±1.91      | 8.51±1.64  | 8.55±1.78  | 0.59                               | 0.92                               | 1.00                               |
| After cycle 3    | 9.25±2.28      | 8.83±1.93  | 8.73±2.03  | 0.89                               | 0.98                               | 1.00                               |
| After cycle 4    | 10.04±3.64     | 8.72±1.63  | 8.65±1.41  | 0.06                               | 0.07                               | 1.00                               |

|                 |           |           |           |        |        |        |
|-----------------|-----------|-----------|-----------|--------|--------|--------|
| > 4 cycles      | 9.45±2.56 | 8.48±1.55 | 8.71±1.69 | 0.29   | 0.63   | 1.00   |
| Autonomic scale |           |           |           |        |        |        |
| Baseline        | 2.35±0.62 | 2.36±0.58 | 2.39±0.57 | 1.00   | 1.00   | 1.00   |
| After cycle 1   | 2.62±0.84 | 2.55±0.71 | 2.56±0.73 | 1.00   | 1.00   | 1.00   |
| After cycle 2   | 2.71±0.83 | 2.61±0.75 | 2.65±0.80 | 1.00   | 1.00   | 1.00   |
| After cycle 3   | 2.79±0.89 | 2.76±0.86 | 2.85±0.91 | 1.00   | 1.00   | 0.9999 |
| After cycle 4   | 2.98±1.01 | 2.72±0.73 | 2.75±0.85 | 0.9996 | 0.9998 | 1.00   |
| > 4 cycles      | 2.99±0.93 | 2.86±0.95 | 2.71±0.78 | 1.00   | 0.9812 | 0.9999 |

The above analysis used a linear mixed-effect model, and the subsequent pairwise comparisons were corrected using the Scheffé method. Score values are the observed mean ± SE.

<sup>a</sup> the nab-paclitaxel group versus paclitaxel group

<sup>b</sup> the nab-paclitaxel group versus docetaxel group

<sup>c</sup> the paclitaxel group versus docetaxel group

**eTable 2.** Pairwise Association Between Types of Taxanes and Patient-Reported CIPN Among Patients with Breast Cancer

| EORTC QLQ-CIPN20                                                                                                                                                                                                                                                                                                                              |                              | HR (95% CI) <sup>a</sup> | P value | HR (95% CI) <sup>b</sup> | P value | HR (95% CI) <sup>c</sup> | P value |
|-----------------------------------------------------------------------------------------------------------------------------------------------------------------------------------------------------------------------------------------------------------------------------------------------------------------------------------------------|------------------------------|--------------------------|---------|--------------------------|---------|--------------------------|---------|
| Total Score                                                                                                                                                                                                                                                                                                                                   | Paclitaxel vs nab-paclitaxel | 0.61 (0.51-0.74)         | <.001   | 0.68 (0.56-0.84)         | <.001   | 0.61 (0.49-0.75)         | <.001   |
|                                                                                                                                                                                                                                                                                                                                               | Docetaxel vs nab-paclitaxel  | 0.65 (0.54-0.79)         | <.001   | 0.69 (0.56-0.85)         | <.001   | 0.66 (0.54-0.82)         | <.001   |
|                                                                                                                                                                                                                                                                                                                                               | Docetaxel vs paclitaxel      | 1.06 (0.91-1.24)         | .47     | 1.01 (0.86-1.19)         | .90     | 1.09 (0.92-1.31)         | .31     |
| Sensory scale                                                                                                                                                                                                                                                                                                                                 | Paclitaxel vs nab-paclitaxel | 0.45 (0.38-0.54)         | <.001   | 0.51 (0.41-0.62)         | <.001   | 0.47 (0.38-0.58)         | <.001   |
|                                                                                                                                                                                                                                                                                                                                               | Docetaxel vs nab-paclitaxel  | 0.49 (0.41-0.60)         | <.001   | 0.56 (0.46-0.69)         | <.001   | 0.54 (0.44-0.66)         | <.001   |
|                                                                                                                                                                                                                                                                                                                                               | Docetaxel vs paclitaxel      | 1.10 (0.93-1.30)         | .29     | 1.11 (0.93-1.31)         | .26     | 1.14 (0.95-1.37)         | .17     |
| Motor scale                                                                                                                                                                                                                                                                                                                                   | Paclitaxel vs nab-paclitaxel | 0.86 (0.72-1.03)         | .10     | 0.90 (0.74-1.11)         | .33     | 0.76 (0.62-0.94)         | .01     |
|                                                                                                                                                                                                                                                                                                                                               | Docetaxel vs nab-paclitaxel  | 0.71 (0.59-0.86)         | <.001   | 0.71 (0.58-0.88)         | .002    | 0.68 (0.55-0.85)         | <.001   |
|                                                                                                                                                                                                                                                                                                                                               | Docetaxel vs paclitaxel      | 0.82 (0.70-0.98)         | .03     | 0.79 (0.66-0.94)         | .01     | 0.90 (0.74-1.08)         | .26     |
| Autonomic scale                                                                                                                                                                                                                                                                                                                               | Paclitaxel vs nab-paclitaxel | 1.00 (0.83-1.21)         | .98     | 1.07 (0.87-1.32)         | .54     | 0.99 (0.79-1.23)         | .91     |
|                                                                                                                                                                                                                                                                                                                                               | Docetaxel vs nab-paclitaxel  | 0.87 (0.71-1.06)         | .15     | 0.90 (0.72-1.12)         | .38     | 0.90 (0.72-1.12)         | .35     |
|                                                                                                                                                                                                                                                                                                                                               | Docetaxel vs paclitaxel      | 0.87 (0.73-1.03)         | .10     | 0.84 (0.71-1.01)         | .06     | 0.91(0.75-1.11)          | .35     |
| <sup>a</sup> Univariate model only include types of taxanes.<br><sup>b</sup> Multivariable models accounted for baseline characteristics, including patient age, ethnicity, BMI, diabetes, history of peripheral neuropathy, treatment stage and chemotherapy regimens.<br><sup>c</sup> Model further adjusted for treatment cycles and ki67. |                              |                          |         |                          |         |                          |         |

**eTable 3.** Multivariate Analysis Using Semiparametric Proportional Hazards Models

| Characteristics                                                                                      | Coefficient | 95% CI <sup>b</sup> |             | P     |
|------------------------------------------------------------------------------------------------------|-------------|---------------------|-------------|-------|
|                                                                                                      |             | Lower limit         | Upper limit |       |
| Age                                                                                                  | 0.00        | -0.01               | 0.01        | .90   |
| Ethnicity (compared to the Han population)                                                           |             |                     |             |       |
| Other minorities                                                                                     | -0.10       | -0.39               | 0.18        | .48   |
| BMI <sup>a</sup>                                                                                     | 0.02        | -0.13               | 0.16        | .79   |
| History of diabetes                                                                                  | 0.07        | -0.24               | 0.39        | .65   |
| History of peripheral neuropathy                                                                     | 0.59        | -0.05               | 1.22        | .07   |
| Ki67% (compared to <20%)                                                                             |             |                     |             |       |
| ≥20%                                                                                                 | -0.00       | -0.20               | 0.19        | .96   |
| Missing                                                                                              | -0.23       | -0.49               | 0.04        | .09   |
| Treatment cycles                                                                                     | -0.11       | -0.16               | -0.05       | <.001 |
| Treatment stage (compared to adjuvant patients)                                                      |             |                     |             |       |
| Palliative                                                                                           | 0.28        | 0.06                | 0.51        | .01   |
| Neoadjuvant                                                                                          | 0.07        | -0.13               | 0.28        | .47   |
| Chemotherapy regimens (compared to monotherapy)                                                      |             |                     |             |       |
| Combinations                                                                                         | 0.09        | -0.07               | 0.24        | .29   |
| Types of taxanes (compared to nab-paclitaxel)                                                        |             |                     |             |       |
| Paclitaxel                                                                                           | -0.50       | -0.72               | -0.29       | <.001 |
| Docetaxel                                                                                            | -0.41       | -0.62               | -0.20       | <.001 |
| <sup>a</sup> Body mass index, calculated as weight in kilograms divided by height in meters squared. |             |                     |             |       |
| <sup>b</sup> Confidence Interval                                                                     |             |                     |             |       |

**eFigure 1.** Propensity Score Distributions According the Types of Taxanes Used

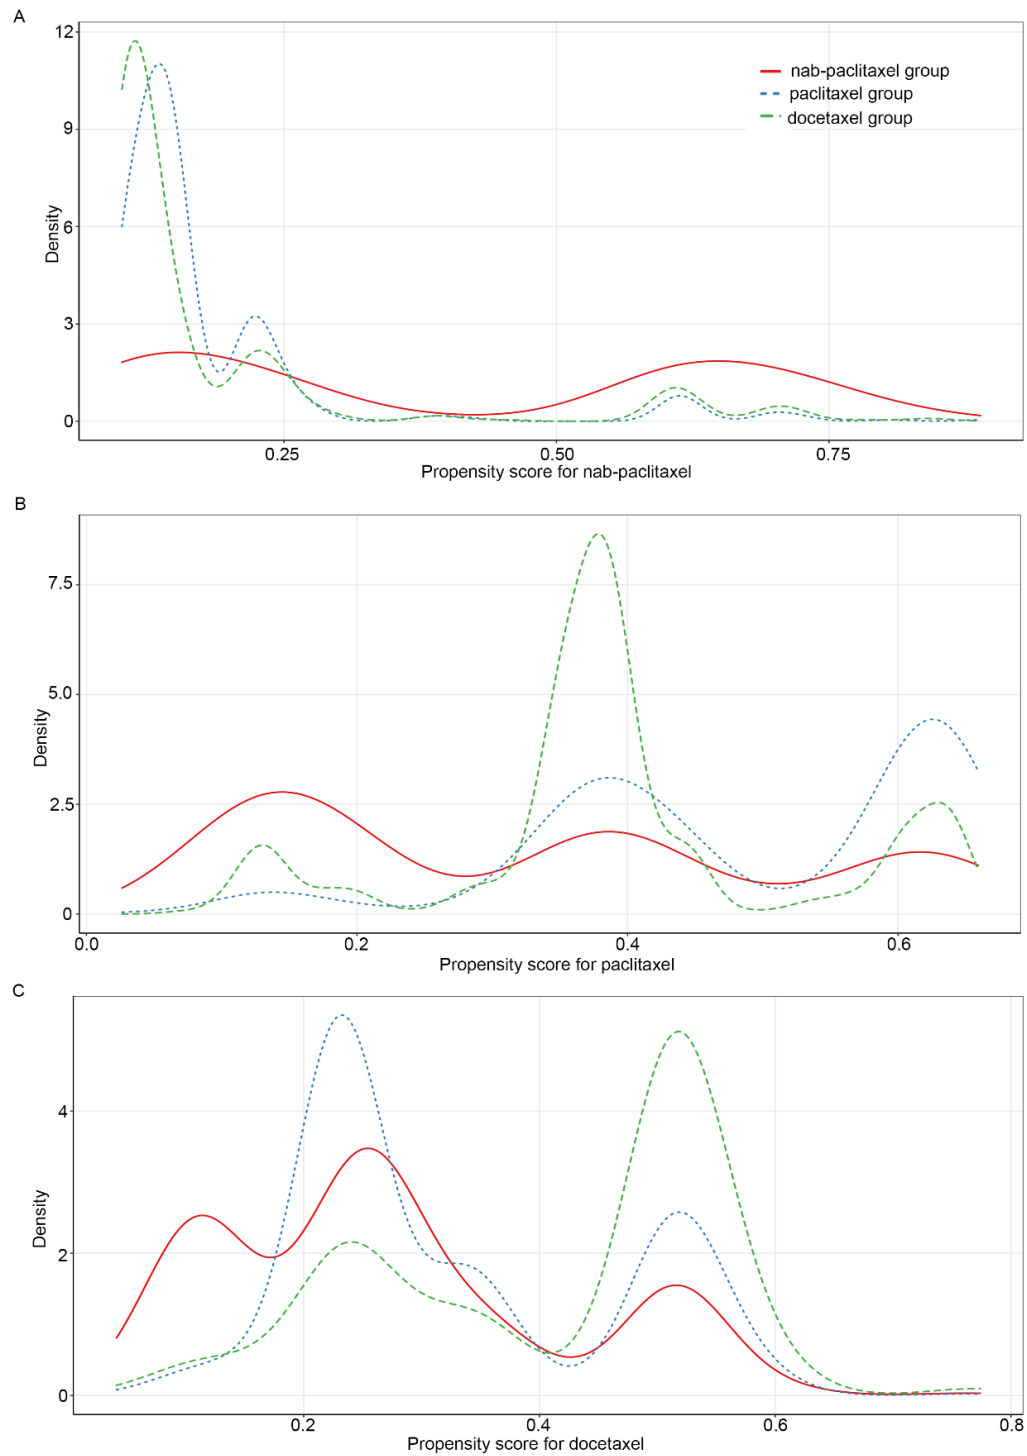

Figure legend: Density plots of estimated generalized propensity scores for nab-paclitaxel (A), paclitaxel (B) and docetaxel (C) were shown.

**eTable 4.** Overlap Propensity Score–Weighted Demographic and Clinical Characteristics of the Cohort<sup>a</sup>

| Characteristics                                 | Patients, %    |             |            |                |
|-------------------------------------------------|----------------|-------------|------------|----------------|
|                                                 | Nab-paclitaxel | Paclitaxel  | Docetaxel  | <i>P</i> value |
| Age, mean (SD)                                  | 51.0 (11.1)    | 51.4 (10.5) | 50.8 (9.7) | .68            |
| Ethnicity                                       |                |             |            | .98            |
| Han                                             | 93.0           | 93.0        | 92.4       |                |
| Other minorities                                | 7.0            | 7.0         | 7.6        |                |
| Body mass index, kg/m <sup>2</sup> <sup>b</sup> | 24.0           | 23.9        | 23.9       | .89            |
| Diabetes                                        |                |             |            | .95            |
| No                                              | 92.4           | 92.4        | 91.3       |                |
| Yes                                             | 7.6            | 7.6         | 8.7        |                |
| History of peripheral neuropathy                |                |             |            | .99            |
| No                                              | 98.1           | 98.0        | 97.8       |                |
| Yes                                             | 1.9            | 2.0         | 2.2        |                |
| Treatment stage                                 |                |             |            | .99            |
| Adjuvant                                        | 67.2           | 64.8        | 64.1       |                |
| Palliative                                      | 14.5           | 15.7        | 16.5       |                |
| Neoadjuvant                                     | 18.3           | 19.5        | 19.4       |                |
| Chemotherapy regimens                           |                |             |            | .80            |
| Monotherapy                                     | 37.1           | 36.3        | 40.6       |                |
| Combinations <sup>c</sup>                       | 62.9           | 63.7        | 59.4       |                |

<sup>a</sup> Reported is either the overlap propensity score–weighted mean or proportion for each group. Comparisons between groups were performed using analysis of variance or chi-square test.

<sup>b</sup> Calculated as weight in kilograms divided by height in meters squared.

<sup>c</sup> Taxanes in combination with other chemotherapeutic drugs.

**eFigure 2.** Covariate Balance Assessment in Overlap Weighting Using Maximum Pairwise Absolute Standardized Difference (ASD)

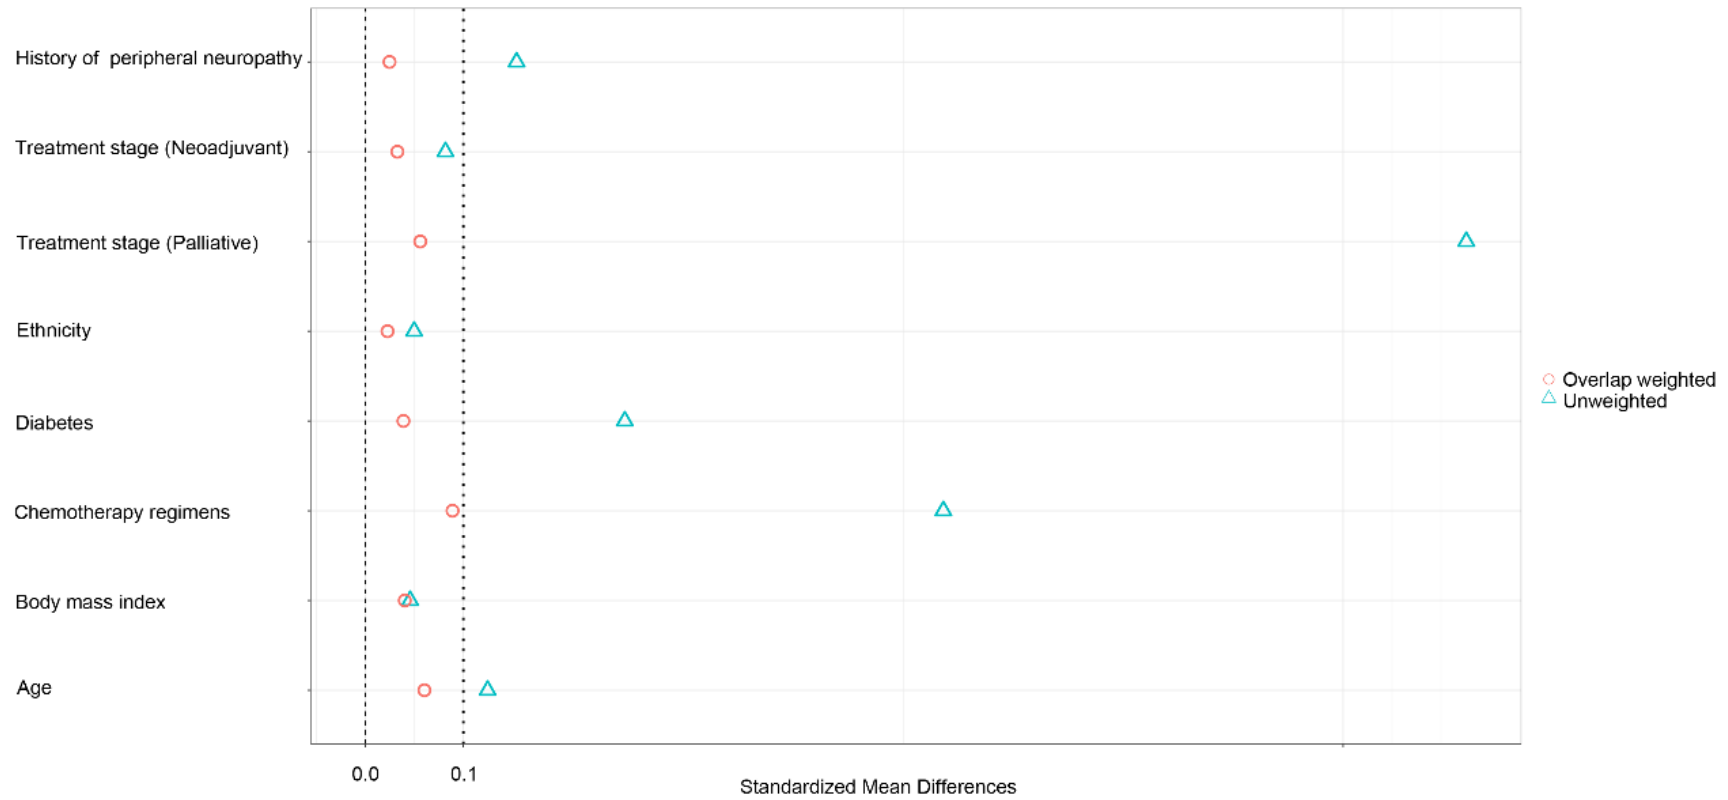

Figure legend: The covariate was considered to be balanced well when the absolute value of ASD was less than 0.1.



**eTable 5.** Overlap Propensity Score–Weighted Multivariate Analysis

| Characteristics                                                                                      | Coefficient | 95% CI <sup>b</sup> |             | P    |
|------------------------------------------------------------------------------------------------------|-------------|---------------------|-------------|------|
|                                                                                                      |             | Upper limit         | Lower limit |      |
| Age                                                                                                  | 0.00        | -0.01               | 0.02        | .79  |
| Ethnicity (compared to the Han population)                                                           |             |                     |             |      |
| Other minorities                                                                                     | -0.02       | -0.59               | 0.55        | .94  |
| BMI <sup>a</sup>                                                                                     | 0.04        | -0.26               | 0.34        | .80  |
| History of diabetes                                                                                  | 0.07        | -0.51               | 0.65        | .82  |
| History of peripheral neuropathy                                                                     | 0.41        | -0.82               | 1.64        | .51  |
| Ki67% (compared to <20%)                                                                             |             |                     |             |      |
| ≥20%                                                                                                 | 0.03        | -0.40               | 0.47        | .89  |
| Missing                                                                                              | -0.26       | -0.81               | 0.29        | .35  |
| Treatment cycles                                                                                     | -0.09       | -0.19               | 0.02        | .10  |
| Treatment stage (compared to adjuvant patients)                                                      |             |                     |             |      |
| Palliative                                                                                           | 0.27        | -0.14               | 0.69        | .20  |
| Neoadjuvant                                                                                          | 0.11        | -0.28               | 0.50        | .58  |
| Chemotherapy regimens (compared to monotherapy)                                                      |             |                     |             |      |
| Combinations                                                                                         | 0.09        | -0.23               | 0.41        | .59  |
| Types of taxanes (compared to nab-paclitaxel)                                                        |             |                     |             |      |
| Paclitaxel                                                                                           | -0.52       | -0.90               | -0.13       | .008 |
| Docetaxel                                                                                            | -0.43       | -0.80               | -0.06       | .02  |
| <sup>a</sup> Body mass index, calculated as weight in kilograms divided by height in meters squared. |             |                     |             |      |
| <sup>b</sup> Confidence Interval                                                                     |             |                     |             |      |

**eTable 6.** Pairwise Association Between Types of Taxanes and Patient-Reported CIPN in the Inverse Probability Weighting Analysis

| Covariates                                                                                                                                                                                                                                                                                                                                                                                                                                                                                              | HR (95% CI) <sup>a</sup> | P value | HR (95% CI) <sup>b</sup> | P value | HR (95% CI) <sup>c</sup> | P value |
|---------------------------------------------------------------------------------------------------------------------------------------------------------------------------------------------------------------------------------------------------------------------------------------------------------------------------------------------------------------------------------------------------------------------------------------------------------------------------------------------------------|--------------------------|---------|--------------------------|---------|--------------------------|---------|
| Types of taxanes                                                                                                                                                                                                                                                                                                                                                                                                                                                                                        |                          |         |                          |         |                          |         |
| Paclitaxel vs nab-paclitaxel                                                                                                                                                                                                                                                                                                                                                                                                                                                                            | 0.68 (0.61-0.75)         | <.001   | 0.68 (0.61-0.75)         | <.001   | 0.60 (0.50-0.73)         | <.001   |
| Docetaxel vs nab-paclitaxel                                                                                                                                                                                                                                                                                                                                                                                                                                                                             | 0.67 (0.61-0.74)         | <.001   | 0.67 (0.61-0.74)         | <.001   | 0.66 (0.57-0.76)         | <.001   |
| Docetaxel vs paclitaxel                                                                                                                                                                                                                                                                                                                                                                                                                                                                                 | 0.99 (0.89-1.10)         | .88     | 0.99 (0.90-1.10)         | .89     | 1.10 (0.98-1.23)         | .12     |
| Age                                                                                                                                                                                                                                                                                                                                                                                                                                                                                                     | -                        | -       | 1.00 (0.99-1.00)         | .94     | 1.00 (0.99-1.00)         | .97     |
| Ethnicity                                                                                                                                                                                                                                                                                                                                                                                                                                                                                               |                          |         |                          |         |                          |         |
| Other minorities vs the Han population                                                                                                                                                                                                                                                                                                                                                                                                                                                                  | -                        | -       | 0.95 (0.81-1.11)         | .52     | 0.99 (0.83-1.17)         | .90     |
| BMI                                                                                                                                                                                                                                                                                                                                                                                                                                                                                                     | -                        | -       | 1.01 (0.92-1.10)         | .90     | 1.00 (0.92-1.09)         | .99     |
| History of diabetes                                                                                                                                                                                                                                                                                                                                                                                                                                                                                     | -                        | -       | 1.05 (0.88-1.27)         | .57     | 1.04 (0.88-1.23)         | .65     |
| History of peripheral neuropathy                                                                                                                                                                                                                                                                                                                                                                                                                                                                        | -                        | -       | 1.64 (1.26-2.12)         | <.001   | 1.63 (1.25-2.11)         | <.001   |
| Treatment stage                                                                                                                                                                                                                                                                                                                                                                                                                                                                                         |                          |         |                          |         |                          |         |
| Palliative vs adjuvant patients                                                                                                                                                                                                                                                                                                                                                                                                                                                                         | -                        | -       | 1.24 (1.10-1.40)         | <.001   | 1.29 (1.14-1.45)         | <.001   |
| Neoadjuvant vs adjuvant patients                                                                                                                                                                                                                                                                                                                                                                                                                                                                        | -                        | -       | 1.03 (0.92-1.17)         | .57     | 1.08 (0.96-1.22)         | .18     |
| Chemotherapy regimens                                                                                                                                                                                                                                                                                                                                                                                                                                                                                   |                          |         |                          |         |                          |         |
| Combinations vs monotherapy                                                                                                                                                                                                                                                                                                                                                                                                                                                                             | -                        | -       | 1.14 (1.04-1.24)         | .003    | 1.06 (0.96-1.17)         | .27     |
| Ki67% (compared to <20%)                                                                                                                                                                                                                                                                                                                                                                                                                                                                                |                          |         |                          |         |                          |         |
| >20%                                                                                                                                                                                                                                                                                                                                                                                                                                                                                                    | -                        | -       | -                        | -       | 1.03 (0.91-1.16)         | .69     |
| Missing                                                                                                                                                                                                                                                                                                                                                                                                                                                                                                 | -                        | -       | -                        | -       | 0.77 (0.66-0.90)         | <.001   |
| Treatment cycles                                                                                                                                                                                                                                                                                                                                                                                                                                                                                        | -                        | -       | -                        | -       | 0.90 (0.87-0.94)         | <.001   |
| <sup>a</sup> Univariate model only include types of taxanes.<br><sup>b</sup> Multivariable models accounted for baseline characteristics, including patient age, ethnicity, BMI, diabetes, history of peripheral neuropathy, treatment stage and chemotherapy regimens.<br><sup>c</sup> Model further adjusted for treatment cycles and ki67.<br>Abbreviations: HR, Hazard Ratio; CI, Confidence Interval; BMI, Body mass index, calculated as weight in kilograms divided by height in meters squared. |                          |         |                          |         |                          |         |
